# Supplementary material for: Association between systemic inflammatory response index (SIRI) and all-cause mortality in patients with heart failure: a retrospective analysis based on the largescale clinical database MIMIC-IV
Source: Research Square preprint supplement (doi:10.21203/rs.3.rs-7035962/v1), 2025-07-18
Supplement: Supplementary file 1 [file 1c5a0965c662c23456c43882.pdf]

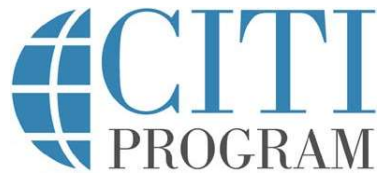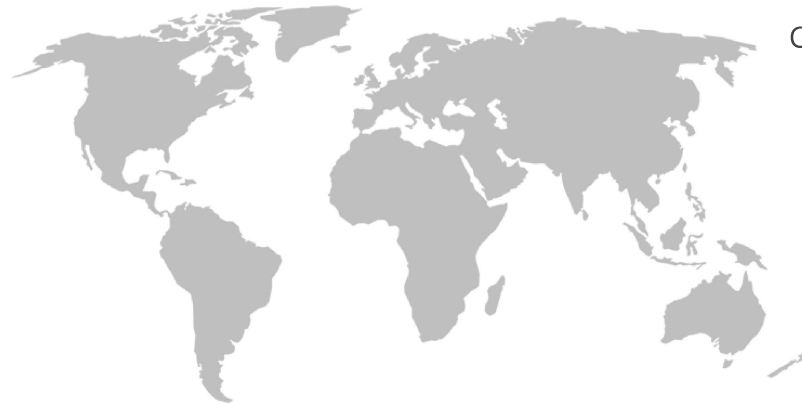

Completion Date 08-Feb-2025

Expiration Date 08-Feb-2026

Record ID 67888378

This is to certify that:

**Chen Wang**

Has completed the following CITI Program course:

Not valid for renewal of  
certification through CME.

**French Language Course**

(Curriculum Group)

**French Language**

(Course Learner Group)

**1 - Stage 1**

(Stage)

Under requirements set by:

**Massachusetts Institute of Technology Affiliates**

**CITI**

Collaborative Institutional Training Initiative

101 NE 3rd Avenue, Suite 320

Fort Lauderdale, FL 33301 US

[www.citiprogram.org](http://www.citiprogram.org)

Generated on 08-Feb-2025. Verify at [www.citiprogram.org/verify/?wa1b14c60-0a0a-4be7-a914-793e5cc818cc-67888378](http://www.citiprogram.org/verify/?wa1b14c60-0a0a-4be7-a914-793e5cc818cc-67888378)
